# Supplementary material
Source: PubMed Central journal article supplement (PMC7931845)
Supplement: NIHMS1645135-supplement-1.pdf [file NIHMS1645135-supplement-1.pdf]

**Supplementary information:**

| <b>Primer name</b> | <b>Sequence</b>                         | <b>Usage</b>                  |
|--------------------|-----------------------------------------|-------------------------------|
| <b>SY094</b>       | ACCAGGTTTCGTTCACTCATGGAAAATAGCG         | Cloning of C-terminal Cre     |
| <b>SY095</b>       | GCGGCCGCCTAATCGCCATCTTCCAGCAGGCGCACCAT  | Cloning of C-terminal Cre     |
| <b>SY096</b>       | GATATCGCCGCCACCATGCCCAAGAAGAAGAGGAAGGTG | Cloning of PhyB               |
| <b>SY097</b>       | GCATGCAACAGCTCCCAAACACTTC               | Cloning of PhyB               |
| <b>SY118</b>       | CCGGAATTCATGCCCAAGAAGAAGAGGAAG          | Subclone of PIF6CreN fragment |
| <b>SY119</b>       | GCTCTCGAGTCAGTTCAGCTTGCACCAGG           | Subclone of PIF6CreN fragment |

**Table S1. Primers**

| <b>Addgene #</b> | <b>Name</b>     | <b>Application</b>                               |
|------------------|-----------------|--------------------------------------------------|
| <b>131780</b>    | pCS2+ PIF6CreN  | For <i>in vitro</i> transcription of PIF6APBCreN |
| <b>131781</b>    | pCS2+ PhyBΔCreC | For <i>in vitro</i> transcription of PhyBΔCreC   |

**Table S2. Plasmids**

## Sequences

*230 bp fragment*

AGCCGGAGTCAGCCATGGGAAACTGCGGAAATGGATGCGATTCACTCGCTCCAGCT  
TATTCTGAGAGACTCTTTTAAAGAATCTGGTGGTTCTGCCGGTGGCTCCGGTTCTGGC  
TCCAGCGGTGGCAGCTCTGGTGCCTCCGGCACGGGTACTGCGGGTGGCACTGGCAG  
CGGTTCCGGTACTGGCTCTGGCAACCGGAAATGGTTTCCCGCAGAACCTGAAGATGT  
TCG

*PhyBΔCreC*

ATGCCAAGAAGAAGAGGAAGGTGTTTCCGGAGTCGGGGTAGTGGCGGTGGCCGTGGCAGTGGCCGTG  
GCGGAGAAGAAGAACCGTCGTCAAGTCACACTCCTAATAACCGAAGAGGAGGAGAACAAGCTCAATCGTC  
GGGAACGAAATCTCTCAGACCAAGAAGCAACACTGAATCAATGAGCAAAGCAATTCAACAGTACACCGTC  
GACGCAAGACTCCACGCCGTTTTCGAACAATCCGGCGAATCAGGGAAATCATTGACTACTCACAATCAC  
TCAAAACGACGACGTACGGTTCCTCTGTACCTGAGCAACAGATCACAGCTTATCTCTCTCGAATCCAGCG  
AGGTGGTTACATTCAGCCTTTCGGATGTATGATCGCCGTCGATGAATCCAGTTTCCGGATCATCGGTTAC  
AGTGAAAACGCCAGAGAAATGTTAGGGATTATGCCTCAATCTGTTCTACTCTTGAGAAACCTGAGATTC  
TAGCTATGGAACTGATGTGAGATCTTGTTCACTTCTTCGAGCTCGATTCTACTCGAGCGTGCTTTCGT  
TGCTCGAGAGATTACCTTGTTAAATCCGGTTTGGATCCATTCCAAGAATACTGGTAAACCGTTTTACGCC  
ATTCTTCATAGGATTGATGTTGGTGTGTTATTGATTTAGAGCCAGCTAGAACTGAAGATCCTGCGCTTT  
CTATTGCTGGTGTGTTCAATCGCAGAACTCGCGTTCGTGCGATTTCTCAGTTACAGGCTCTTCCTGG  
TGGAGATATTAAGCTTTTGTGTGACACTGTCGTGGAAAGTGTGAGGGACTTGACTGGTTATGATCGTGTT  
ATGGTTTATAAGTTTCATGAAGATGAGCATGGAGAAGTTGTAGCTGAGAGTAAACGAGATGATTTAGAGC  
CTTATATTGGACTGCATTATCCTGCTACTGATATCCTCAAGCGTCAAGGTTCTTGTTAAGCAGAACCG  
TGTCCGAATGATAGTAGATTGCAATGCCACACCTGTTCTTGTGGTCCAGGACGATAGGCTAACTCAGTCT  
ATGTGCTTGGTTGGTTCTACTCTTAGGGCTCCTCATGGTTGTCACTCTCAGTATATGGCTAACATGGGAT  
CTATTGCGTCTTAGCAATGGCGGTTATAATCAATGGAAATGAAGATGATGGGAGCAATGTAGCTAGTGG  
AAGAAGCTCGATGAGGCTTGGGGTTGGTTGTTTGCATCACACTTCTTCTCGCTGCATACCGTTTCCG  
CTAAGGTATGCTTGTGAGTTTTTGTGAGGCTTTCGGTTACAGTTAAACATGGAATTGCAGTTAGCTT  
TGCAAATGTCAGAGAAACGCGTTTTGAGAACGCAGACACTGTTATGTGATATGCTTCTGCGTGACTCGCC  
TGCTGGAATTGTTACACAGAGTCCAGTATCATGGACTTAGTGAAATGTGACGGTGCAGCATTTCTTTAC  
CACGGGAAGTATTACCGTTGGGTGTTGCTCCTAGTGAAGTTCAGATAAAAGATGTTGTGGAGTGGTTGC  
TTGCGAATCATGCGGATTCAACCGGATTAAGCACTGATAGTTTAGGCGATGCGGGGTATCCCGGTGCAGC  
TGCGTTAGGGGATGCTGTGTGCGGTATGGCAGTTGCATATATCACAAAAGAGACTTTCTTTTTTGGTTT  
CGATCTCACACTGCGAAAGAAATCAAATGGGGAGGCGCTAAGCATCATCCGGAGGATAAAGATGATGGGC  
AACGAATGCATCCTCGTTCGTCCTTTCAGGCTTTTCTTGAAGTTGTTAAGAGCCGGAGTCAGCCATGGGA  
AACTGCGGAAATGGATGCGATTCACTCGCTCCAGCTTATTCTGAGAGACTCTTTTAAAGAATCTGGTGGT  
TCTGCCGGTGGCTCCGGTTCGGCTCCAGCGGTGGCAGCTCTGGTGCCTCCGGCACGGGTACTGCGGGTG  
GCACTGGCAGCGGTTCCGGTACTGGCTCTGGCAACCGGAAATGGTTTCCCGCAGAACCTGAAGATGTTTCG

CGATTATCTTCTATATCTTCAGGCGCGGGTCTGGCAGTAAAACTATCCAGCAACATTTGGGCCAGCTA  
AACATGCTTCATCGTCGGTCCGGGCTGCCACGACCAAGTGACAGCAATGCTGTTTCACTGGTTATGCGGC  
GGATCCGAAAAGAAAACGTTGATGCCGGTGAACGTGAAAACAGGCTCTAGCGTTCGAACGCACTGATTT  
CGACCAGTTTCGTTCACTCATGGAAAATAGCGATCGCTGCCAGGATATACGTAATCTGGCATTCTGGGG  
ATTGCTTATAACACCCTGTTACGTATAGCCGAAATTGCCAGGATCAGGGTTAAAGATATCTCACGTA  
ACGGTGGGAGAATGTTAATCCATATTGGCAGAACGAAAACGCTGGTTAGCACCCGAGGTGTAGAGAAGGC  
ACTTAGCCTGGGGTA  
ACTAACTGGTCGAGCGATGGATTTCCGTCTCTGGTGTAGCTGATGATCCGAAT  
AACTACCTGTTTTGCCGGTCAGAAAAATGGTGTGCCGCGCCATCTGCCACCAGCCAGCTATCAACTC  
GCGCCCTGGAAGGGATTTTTGAAGCAACTCATCGATTGATTTACGGCGCTAAGGATGACTCTGGTCAGAG  
ATACCTGGCCTGGTCTGGACACAGTGCCCGTGTGCGAGCCGCGGAGATATGGCCCGCGCTGGAGTTTCA  
ATACCGGAGATCATGCAAGCTGGTGGCTGGACCAATGTAATATTGTCATGAACTATATCCGTAACCTGG  
ATAGTGAAACAGGGGCAATGGTGCCTGCTGGAAGATGGCGATTAG

NLS

PhyBΔ (1-621 a.a.)

GSAT linker (36 a.a.)

CreC (60 – 343 a.a.)

*PIF6CreN*

ATGCCAAGAAGAAGAGGAAGGTGATGTTCTTACCAACCGATTATTGTTGCAGGTTAAGCGATCAAGAGT  
ATATGGAGCTTGTGTTGAGAATGGCCAGATTCTTGCAAAGGGCCAAAGATCCAACGTTTCTCTGCATAA  
TCAACGTACCAAATCGATCATGGATTTGTATGAGGCAGAGTATAACGAGGATTTTCATGAAGAGTATCATC  
CATGGTGGTGGTGGTGGCCATCACAATCTCGGGACACGCAGGTTGTTCCACAAAGTCATGTTGCTGCTG  
CCCATGAAACAAACATGTTGAAAGCAATAAACATGTTGACGGTGGTTCTGCCGGTGGCTCCGGTTCTGG  
CTCCAGCGGTGGCAGCTCTGGTGCCTCCGGCACGGGTA  
CTGCGGTGGCACTGGCAGCGGTTCCGGTACT  
GGCTCTGGCCTGACTGTGCACCAAACCTGCCTGCCCTCCCTGTGGATGCCACCTCTGATGAAGTCAGGA  
AGAACCTGATGGACATGTTCAAGGACAGGCAGGCTTCTCTGAACACACCTGGAAGATGCTCCTGTCTGT  
GTGCAGATCCTGGGCTGCCTGGTGCAAGCTGAAC

NLS

PIF6APB (1 – 100 a.a.)

GSAT linker (36 a.a.)

CreN (19 – 59 a.a.)

*PhyBΔCreC-P2A-PIF6CreN*

ATGCCCAAGAAGAAGAGGAAGGTGGTTTCCGGAGTCGGGGTAGTGGCGGTGGCCGTGGCGGTGGCCGTG  
GCGGAGAAGAAGAACCCTCGTCAAGTCACACTCCTAATAACCGAAGAGGAGGAGAACAAGCTCAATCGTC  
GGGAACGAAATCTCTCAGACCAAGAAGCAACACTGAATCAATGAGCAAAGCAATTCAACAGTACACCGTC  
GACGCAAGACTCCACGCCGTTTTCGAACAAATCCGGCGAATCAGGGAAATCATTGACTACTCACAATCAC  
TCAAAACGACGACGTACGGTTCCTCTGTACCTGAGCAACAGATCACAGCTTATCTCTCTCGAATCCAGCG  
AGGTGGTTACATTCAGCCTTTCGGATGTATGATCGCCGTCGATGAATCCAGTTTCCGGATCATCGGTTAC  
AGTGAAAACGCCAGAGAAATGTTAGGGATTATGCCCTCAATCTGTTCCCTACTCTTGAGAAACCTGAGATTC  
TAGCTATGGAACTGATGTGAGATCTTTGTTCACTTCTTCGAGCTCGATTCTACTCGAGCGTGCTTTCGT  
TGCTCGAGAGATTACCTTGTTAAATCCGGTTTGGATCCATTCCAAGAATACTGGTAAACCGTTTTACGCC  
ATTCTTCATAGGATTGATGTTGGTGTGTTATTGATTTAGAGCCAGCTAGAACTGAAGATCCTGCGCTTT  
CTATTGCTGGTGTGTTCAATCGCAGAACTCGCGGTTCTGTCGATTTCTCAGTTACAGGCTCTTCTCGG  
TGGAGATATTAAGCTTTTGTGTGACACTGTCGTGGAAAGTGTGAGGGACTTGACTGGTTATGATCGTGT  
ATGGTTTATAAGTTTTCATGAAGATGAGCATGGAGAAGTTGTAGCTGAGAGTAAACGAGATGATTTAGAGC  
CTTATATTGGACTGCATTATCCTGCTACTGATATCCTCAAGCGTCAAGGTTCTTGTTAAGCAGAACCG  
TGTCCGAATGATAGTAGATTGCAATGCCACACCTGTTCTTGTGGTCCAGGACGATAGGCTAACTCAGTCT  
ATGTGCTTGGTTGGTCTACTCTTAGGGCTCCTCATGGTTGTCACTCTCAGTATATGGCTAACATGGGAT  
CTATTGCGTCTTTAGCAATGGCGGTTATAATCAATGGAAATGAAGATGATGGGAGCAATGTAGCTAGTGG  
AAGAAGCTCGATGAGGCTTTGGGGTTTGGTTGTTTGCCATCACACTTCTTCTCGCTGCATACCGTTTCCG  
CTAAGGTATGCTTGTGAGTTTTTGTGATGCAGGCTTTTCGGTTTACAGTTAAACATGGAATTGCAGTTAGCTT  
TGCAAATGTCAGAGAAACGCGTTTTGAGAACGCAGACACTGTTATGTGATATGCTTCTGCGTGACTCGCC  
TGCTGGAATTGTTACACAGAGTCCCAGTATCATGGACTTAGTGAAATGTGACGGTGCAGCATTTCTTTAC  
CACGGGAAGTATTACCCGTTGGGTGTTGCTCCTAGTGAAGTTCAGATAAAAGATGTTGTGGAGTGGTTGC  
TTGCGAATCATGCGGATTCAACCGGATTAAGCACTGATAGTTTAGGCGATGCGGGGTATCCCGGTGCAGC  
TGCGTTAGGGGATGCTGTGTGCGGTATGGCAGTTGCATATATCACAAAAGAGACTTTCTTTTTTGGTTT  
CGATCTCACACTGCGAAAGAAATCAAATGGGGAGGCGCTAAGCATCATCCGGAGGATAAAGATGATGGGC  
AACGAATGCATCCTCGTTCGTCCTTTCAGGCTTTTCTTGAAGTTGTTAAGAGCCGGAGTCAGCCATGGGA  
AACTGCGGAAATGGATGCGATTCACTCGCTCCAGCTTATTCTGAGAGACTCTTTTAAAGAATCTGGTGGT  
TCTGCCGGTGGCTCCGTTCTGGCTCCAGCGGTGGCAGCTCTGGTGCCTCCGGCACGGGTACTGCGGGTG  
GCACTGGCAGCGGTTCCGGTACTGGCTCTGGCAACCGGAAATGGTTTCCCGCAGAACCTGAAGATGTTTCG  
CGATTATCTTCTATATCTTACGGCGCGCGGTCTGGCAGTAAAACTATCCAGCAACATTTGGGCCAGCTA  
AACATGCTTCATCGTCCGTTCCGGGCTGCCACGACCAAGTACAGCAATGCTGTTTCACTGGTTATGCGGC  
GGATCCGAAAAGAAAACGTTGATGCCGGTGAACGTGCAAAACAGGCTCTAGCGTTTGAACGCACTGATTT  
CGACCAGGTTTCTTCACTCATGGAAAATAGCGATCGCTGCCAGGATATACGTAATCTGGCATTCTGGGG  
ATTGCTTATAACACCCTGTTACGTATAGCCGAAATGGCCAGGATCAGGGTTAAAGATATCTCACGTACTG  
ACGGTGGGAGAATGTTAATCCATATTGGCAGAACGAAAACGCTGGTTAGCACCCGAGGTGTAGAGAAGGC

ACTTAGCCTGGGGTAACTAACTGGTCGAGCGATGGATTTCCGTCTCTGGTGTAGCTGATGATCCGAAT  
AACTACCTGTTTTGCCGGGTCAGAAAAAATGGTGTGCGCGCCATCTGCCACCAGCCAGCTATCAACTC  
GCGCCCTGGAAGGGATTTTTGAAGCAACTCATCGATTGATTTACGGCGCTAAGGATGACTCTGGTCAGAG  
ATACCTGGCCTGGTCTGGACACAGTGCCCGTGTCTGGAGCCGCGCGAGATATGGCCCGCGCTGGAGTTTCA  
ATACCGGAGATCATGCAAGCTGGTGGCTGGACCAATGTAAATATTGTCATGAACTATATCCGTAACCTGG  
ATAGTGAAACAGGGGCAATGGTGCCTGCTGGAAGATGGCGATGGAAGCGGAGCTACTAACTTCAGCCT  
GCTGAAGCAGGCTGGAGACGTGGAGGAGAACCCTGGACCTATGCCCAAGAAGAAGAGGAAGGTGATGTTC  
TTACCAACCGATTATTGTTGCAGGTTAAGCGATCAAGAGTATATGGAGCTTGTGTTTGAGAATGGCCAGA  
TTCTTGCAAAGGGCCAAAGATCCAACGTTTCTCTGCATAATCAACGTACCAAATCGATCATGGATTTGTA  
TGAGGCAGAGTATAACGAGGATTTTCATGAAGAGTATCATCCATGGTGGTGGTGGTGGCCATCACAAATCTC  
GGGGACACGCAGGTTGTTCCACAAAGTCATGTTGCTGCTGCCCATGAAACAAACATGTTGGAAAGCAATA  
AACATGTTGACGGTGGTCTGCCGGTGGCTCCGGTCTGGCTCCAGCGGTGGCAGCTCTGGTGCCTCCGG  
CACGGGTACTGCGGGTGGCACTGGCAGCGGTTCCGGTACTGGCTCTGGCCTGACTGTGCACCAAACCTG  
CCTGCCCTCCCTGTGGATGCCACCTCTGATGAAGTCAGGAAGAACCTGATGGACATGTTCAGGGACAGGC  
AGGCCTTCTCTGAACACACCTGGAAGATGCTCCTGTCTGTGTGCAGATCCTGGGCTGCCTGGTGCAGCT  
GAACTGA

PhyB $\Delta$ CreC (60-343 a.a.)

GSG-P2A (Kim et al., 2011)

PIF6APBCreN
